# Supplementary material for: The step-wise assembly of an undecanuclear heterotrimetallic cyanide cluster
Source: Royal Society of Chemistry journal article supplement (doi:10.1039/b418698b), 2005-01-01

*Supporting Information for:*

---

## The step-wise assembly of an undecanuclear heterotrimetallic cyanide cluster

---

Curtis P. Berlinguette<sup>a</sup> and Kim R. Dunbar<sup>\*a</sup>

<sup>a</sup> Department of Chemistry, Texas A&M University, College Station, TX, USA. Tel: +1 979 845-5235; E-mail: [dunbar@mail.chem.tamu.edu](mailto:dunbar@mail.chem.tamu.edu)

Figure S1. IR spectrum in the  $\nu_{\text{CN}}$  region for compound 2.

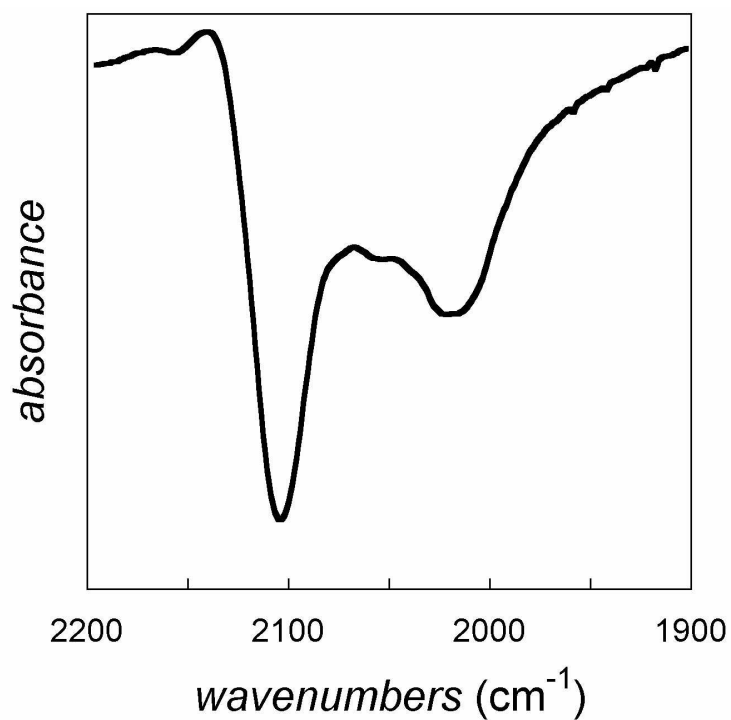

Figure S2. Plot of magnetization ( $M$ ) versus field ( $H$ ) for compound **2** at  $T = 2$  K.

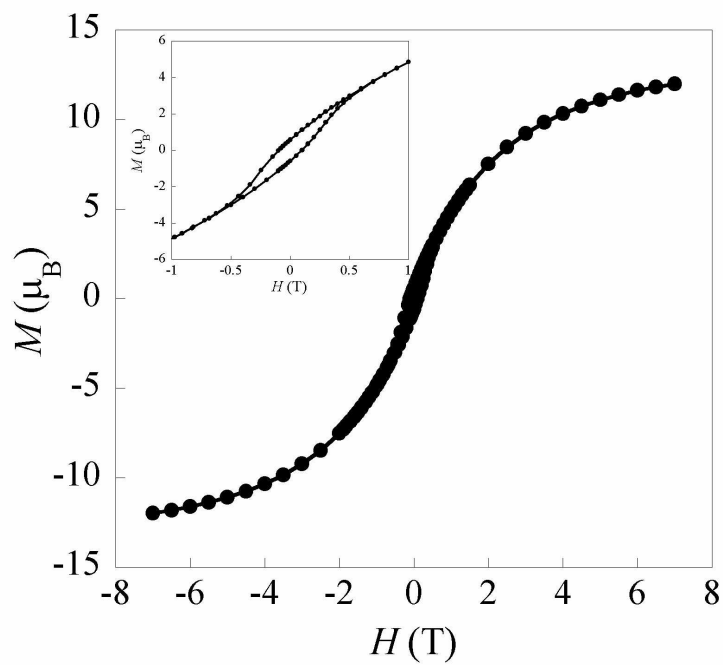

Supplement: b418698b.pdf [file b418698b.pdf]
